# Supplementary material
Source: Research Square preprint supplement (doi:10.21203/rs.3.rs-9231243/v1)
Supplement: Supplementary file 1 [file f03337debafaffef2266eb9a.docx]

**HOUSEHOLD QUESTIONNAIRE TO LIVESTOCK FARMERS IN SELECTED DISTRICTS OF UGANDA CATTLE CORRIDOR**

This questionnaire instrument is intended to obtain information that can be used to find possible solutions to the prevention/ control of Rift Valley Fever in livestock in Uganda. Please answer the questions honestly and correctly. This is for research purposes only and the information given will be kept confidential.

| Herd number |  | Name of respondent  …………………………………………………….. | Position  ………….……………….. | Contact  …………………………..… |
| --- | --- | --- | --- | --- |
| Date |  | Village/location |  |  |
| GPS coordinates | Latitude: | Parish |  |  |
| Longitude: |
| Elevation |  | Sub-county |  |  |
| District |  |  |

**1. Details of Household head**

| Name of household head | Gender | Age (yrs) | Level of Education | Position in HH | Occupation |
| --- | --- | --- | --- | --- | --- |
|  |  |  |  |  |  |
| Name of respondent if HH is absent | Gender | Age (yrs) | Level of Education | Position in HH | Occupation |
|  |  |  |  |  |  |

| **Gender** | **Age (yrs)** | **Level of Education** | **Position in HH** | **Occupation** |
| --- | --- | --- | --- | --- |
| 1=Male |  | 1= No formal education | 1 = Husband | 1=Farmer |
| 2=Female |  | 2= Primary school | 2 = Wife | 2=Civil servant |
|  |  | 3= Secondary school | 3 = Son | 3=Business person |
|  |  | 4= Technical training/Teachers college | 4 = Daughter | 4=Farm worker |
|  |  | 5= University | 5 = Farm worker | 5=Retired |
|  |  | 6= Other (specify) | 6 = Others (specify) | 6=Other (specify) |

1. **Herd size: how many animals of different species and ages are in the herd?**

| Species | Young  <1 year |  |  |  | Mature >1 year | |  | Total |
| --- | --- | --- | --- | --- | --- | --- | --- | --- |
| Male |  | Female | Male |  |  | Female |  |
| Cattle |  |  |  |  |  |  |  |  |
| Sheep |  |  |  |  |  |  |  |  |
| Goats |  |  |  |  |  |  |  |  |

1. **Herd dynamics: in the past year, how many animals have been added to the herd - births, purchases, gifts etc.? In the past year, how many animals have left the herd - death, sale, slaughter, gifts etc.?**

| Species | No. born | No dead | No.  bought | No. sold | No.  slaughtered | No. gifted or loaned | No. gifts received or  borrowed | Other reasons for leaving herd  (stolen, lost, predator) | Other reasons for joining herd  (stray animal, breeding bull) |
| --- | --- | --- | --- | --- | --- | --- | --- | --- | --- |
| Cattle |  |  |  |  |  |  |  |  |  |
| Sheep |  |  |  |  |  |  |  |  |  |
| Goats |  |  |  |  |  |  |  |  |  |

| Species | **3. Production type: What is the main reason for keeping each species?** | | | **4. Production system:**  **What is the main farming system?** | | | **6. Housing:**  **Are the animals enclosed?** | |
| --- | --- | --- | --- | --- | --- | --- | --- | --- |
|  | Dairy | Meat | Multi- purpose | Sedentary mixed farming | Agro- pastoralist | Pastoralist | Enclosed at night | Enclosed during day |
| Cattle |  |  |  |  |  |  |  |  |
| Sheep |  |  |  |  |  |  |  |  |
| Goats |  |  |  |  |  |  |  |  |

| Species | **7. Grazing: what type of grazing is practiced?** | | | | **8. Water source: where do the animals drink?** | |
| --- | --- | --- | --- | --- | --- | --- |
|  | Zero-grazed | Fenced | Communal | Migratory | On the farm | Shared water source |
| Cattle |  |  |  |  |  |  |
| Sheep |  |  |  |  |  |  |
| Goats |  |  |  |  |  |  |

1. **Selling live animals: in the past one year, what methods have you used to sell animals?**

| Species | Livestock market | Direct local sale to neighbor or the nearby village | Direct sale to middleman/trader | Other |
| --- | --- | --- | --- | --- |
| Cattle |  |  |  |  |
| Sheep |  |  |  |  |
| Goats |  |  |  |  |

1. **Buying live animals: in the past one year, what methods have you used to buy animals?**

| Species | Livestock market | Direct purchase from neighbor or the nearby village | Direct purchase from middle man/trader | Other |
| --- | --- | --- | --- | --- |
| Cattle |  |  |  |  |
| Sheep |  |  |  |  |
| Goats |  |  |  |  |

1. **Animal health data:**

**In the past one year, have you encountered any sick animal(s) in the herd?**

| Disease | Species affected (C=Cattle, S=Sheep,  G=Goats) | Number sick | Number dead | Number at risk | Was diagnosis confirmed? (1=Yes, 2=No) |
| --- | --- | --- | --- | --- | --- |
| RVF |  |  |  |  |  |
| FMD |  |  |  |  |  |
| Brucellosis |  |  |  |  |  |
| Others (specify) |  |  |  |  |  |

In the last 12 months, has RVF been confirmed in your herd? Yes No Don’t know

What was the basis of your RVF diagnosis?

| Clinical | Laboratory | Epidemiological | Others (Specify) |
| --- | --- | --- | --- |
|  |  |  |  |

1. **Are you currently experiencing suspected RVF in the herd? (Ask if there are any animals in the herd that are currently sick with any of the RVF-like syndromes. Describe the major clinical signs of the disease and ask if they have seen anything like this). Signs e.g sudden abortion storms, high mortalities among lambs, high fever, profused fetid diarrhea (often hemorrhagic), abdominal colic, dysgalactia, jaundice)**

| Disease | Species affected (C=Cattle,  S=Sheep, G=Goats) | Number sick | Number dead | Number at risk | Was the confirmed? (1=Yes, 2=No) | diagnosis |
| --- | --- | --- | --- | --- | --- | --- |
| RVF |  |  |  |  |  |  |

1. **Have you ever vaccinated your animals against RVF?** Yes No Don’t know

**If yes,**

| Species | Vaccine | Date of vaccination | Source of vaccination |
| --- | --- | --- | --- |
|  |  |  |  |

1. **Knowledge about RVF among pastoralist communities**

A. Do you know any signs of RVF in animals?

| High mortality of newborns | Sudden onset of abortion | Mucopurulent  nasal discharge | Weakness | Profuse fetid diarrhoea | High fever | Don’t know |
| --- | --- | --- | --- | --- | --- | --- |
|  |  |  |  |  |  |  |

1. Do you know how RVF is spread in animals? Yes No Don’t know

1. What do you do when there is a disease/RVF outbreak? ……………………………………………………………………………………….

1. Does RVF affect humans? Yes No Don’t know

If yes…go to E

1. Do you know how RVF is transmitted to humans?

| Touching aborted fetus | Sheltering animals in the house | Drinking raw milk | Touching body fluids | Eating raw or undercooked meat | Mosquito bite | Don’t know |
| --- | --- | --- | --- | --- | --- | --- |
|  |  |  |  |  |  |  |

1. Who is at high risk of getting infected with RVF?

| Herdsmen | Butcher men | People who milk cows | People who cook meat | Don’t know | Others (specify) |
| --- | --- | --- | --- | --- | --- |
|  |  |  |  |  |  |

1. Do you know any signs of RVF in humans?

| Hemorrhage | High fever | Muscle pain | Blurred vision | Backache | Headache | Don’t know |
| --- | --- | --- | --- | --- | --- | --- |
|  |  |  |  |  |  |  |

1. How many rainy seasons do you have and which months? …………………………
2. Do you experience floods in this area? Yes No Don’t know

If Yes, which months? …………………….

1. Do you have mosquitoes in this area? Yes No Don’t know

If Yes, which period have more mosquitoes

| Before floods | During flooding | After floods |
| --- | --- | --- |
|  |  |  |

1. **Attitude regarding RVF prevention and control**

| Do you consider RVF an important disease in animals | Yes | No | Don’t know |
| --- | --- | --- | --- |
| Do you consider yourself to be at risk of contracting RVF | Yes | No | Don’t know |
| Do you know measures taken to prevent spread of RVF  If yes list the measures …………………… | Yes | No | Don’t know |
| Do you consider vaccination to be useful in control RVF in animals | Yes | No | Don’t know |
| Do you report sick/dead animals to the authorities/Veterinary Doctors | Yes | No | Don’t know |
| Do you have Veterinary services in the control of RVF | Yes | No | Don’t know |

1. **Practices Regarding Rift Valley Fever Prevention**
2. How do you handle an aborted fetus………………………………………………………………………………………………………………………….
3. Do you consider handling animals infected with RVF a problem Yes No Don’t know

If yes, why? …………………………………………………………..

1. How do you handle suspected RVF cases? …………………….…………………………………………………………………………………………
2. Do you consider the following to be important in the transmission of RVF to humans? ………………………..

| Poor disposal of an aborted fetus | Yes | No | Don’t know |
| --- | --- | --- | --- |
| Sleeping with animals in the same shelter | Yes | No | Don’t know |
| Drinking of raw milk | Yes | No | Don’t know |
| Contact with body fluids from animals | Yes | No | Don’t know |
| Slaughter of RVF Infected/sick animals | Yes | No | Don’t know |
| Eating undercooked meat | Yes | No | Don’t know |
